# Supplementary material for: A Novel Signature Derived from Metabolism-Related Genes GPT and SMS to Predict Prognosis of Laryngeal Squamous Cell Carcinoma
Source: Research Square preprint supplement (doi:10.21203/rs.3.rs-1018287/v1), 2021-11-02
Supplement: Supplementary file 1 [file 019b0a12732c68514abe25c7.xlsx]

## Sheet: Sheet1
Supplementary Table 3 | The sequences of all primers used in this study.
ID	GPT	SMS	GAPDH
Forward primer(5'-3')	CTACATGGGCGAGTGCGG	TACATGCGAAAAACGTGTGGC	GATGCCCCCATGTTCGTCAT
Reverse primer(5'-3')	ATTGAAGACCTGCTCGGTGA	CTTCAGTACCGGGATACAGTCT	TAAGCAGTTGGTGGTGCAGG
