# Supplementary material for: A Novel Signature Derived from Metabolism-Related Genes GPT and SMS to Predict Prognosis of Laryngeal Squamous Cell Carcinoma
Source: Research Square preprint supplement (doi:10.21203/rs.3.rs-1018287/v1), 2021-11-02
Supplement: Supplementary file 2 [file 20887796924c9899281f4087.xlsx]

## Sheet: Sheet1
Supplementary Table 1 | Clinical information of TCGA cohort.
Variable	Case, n
Age
>60y	47
≤60y	64
Gender
Male	91
Female	20
Grade
G1-G2	82
G3	29
Status
Alive	61
Dead	50
TNM Stage
I-II	12
III-IV	86
Not available	13
T classification
T1-2	20
T3-4	78
Not available	13
N classification
N0	43
N+	55
Not available	13
