# Supplementary material for: A Novel Signature Derived from Metabolism-Related Genes GPT and SMS to Predict Prognosis of Laryngeal Squamous Cell Carcinoma
Source: Research Square preprint supplement (doi:10.21203/rs.3.rs-1018287/v1), 2021-11-02
Supplement: Supplementary file 3 [file e759331f0649fe8ebec96368.xlsx]

## Sheet: Sheet1
TABLE 1 | Univariate Cox regression analysis for the identification of prognosis related MRGs.
id	HR	HR.95L	HR.95H	p-value
SMS	2.73513	1.41545	5.2852	0.00275576
PCYT1B	2.60533	1.34479	5.04744	0.00454079
GPT	0.124084	0.0256487	0.600301	0.0094748
MGLL	2.05191	1.1792	3.57049	0.0109838
PSPH	1.61429	1.11118	2.34521	0.0119646
MBOAT2	1.79779	1.12461	2.87393	0.0142621
FMO2	1.75332	1.10805	2.77437	0.0164779
POLD1	0.274716	0.0943642	0.799761	0.0177978
CES2	1.86418	1.08897	3.19124	0.0231646
ALDH1A2	10.2909	1.35528	78.1411	0.0242036
HPRT1	2.71862	1.09364	6.75811	0.0313488
ACP5	0.567169	0.33362	0.964211	0.0362087
FTH1	2.40817	1.01888	5.69182	0.0452215
ACPP	2.24298	1.00532	5.0043	0.0485033
